# Supplementary material for: Ethanol inducible expression of a mesophilic cellulase avoids adverse effects on plant development
Source: PubMed Central journal article supplement (PMC3643885; doi:10.1186/1754-6834-6-53), 2013-04-16

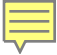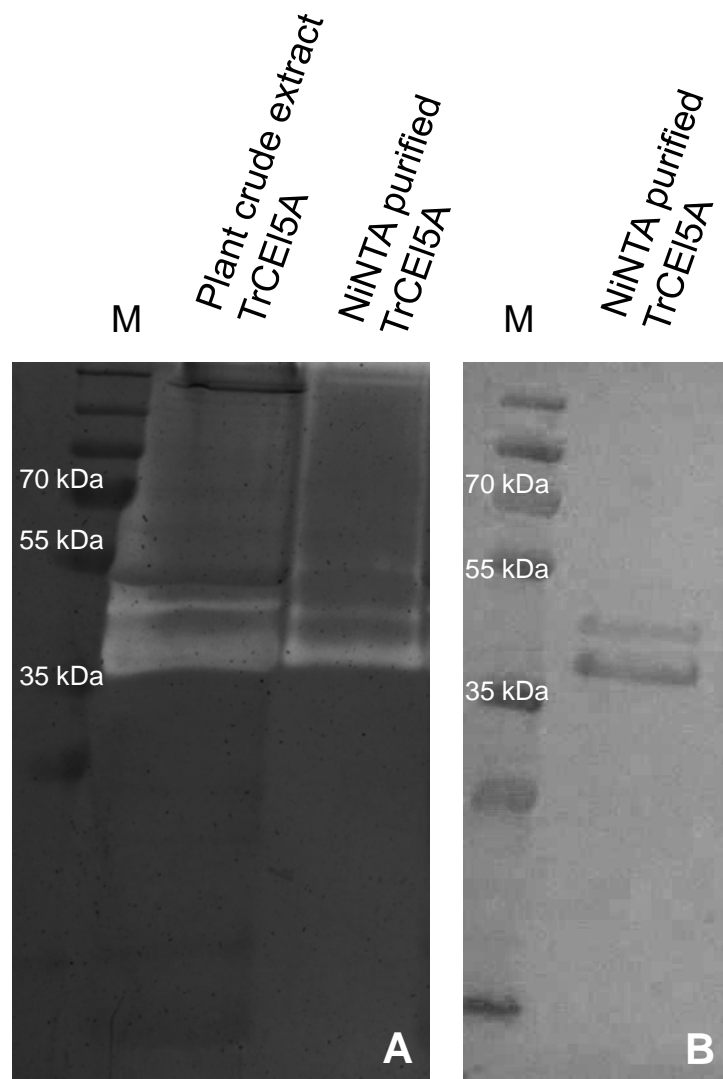

Supplement: 1754-6834-6-53-S1.pdf [file 1754-6834-6-53-S1.pdf]
